# Supplementary material for: Global Genepool Conservation and Use Strategy for Dioscorea (Yam)
Source: Research Square preprint supplement (doi:10.21203/rs.3.rs-3290365/v1), 2023-08-29
Supplement: Supplementary file 1 [file f91728bd6ee766a8a670bf7e.xlsx]

## Sheet: Title
GLOBAL GENEPOOL CONSERVATION AND USE STRATEGY FOR DIOSCOREA (YAM)
M. U. Nduche, J. Magos Brehm, M. Abberton, B. Faloye and N. Maxted
School of Biosciences, University of Birmingham, Edgbaston, Birmingham B15 2TT, UK
Correspondence email address: MUN948@student.bham.ac.uk

## Sheet: Table S1
Table S1: Taxa used for species distribution modeling and criteria for predicted distribution of global yam priority CWR
Taxon	Number of occurrence records	ATAUC	STAUC	Threshold	Number of pixelS with STAUC ˃ 0	Number of pixels with STAUC < 0	Valid	Remark
Dioscorera abyssinica Hochst. ex Kunth	201	0.9767	0.0053	0.1378	59769	2100904	yes	SDM
Dioscorera antaly Jum. & H.Perrier	195	0.994	0.0019	0.2429	8070	2152603	yes	SDM
Dioscorera arachidna Prain & Burkill	71	0.9908	0.0062	0.3117	8887	2151786	yes	SDM
Dioscorera baya De Wild	156	0.9801	0.0083	0.1458	72978	2087695	yes	SDM
Dioscorera brevipetiolata Prain & Burkill	69	0.9921	0.0033	0.2245	17566	2143107	yes	SDM
Dioscorera burkilliana J. Miege	144	0.9889	0.0041	0.2199	32336	2128337	yes	SDM
Dioscorera calcicola Prain & Burkill	2	NA	NA	NA	NA	NA	NA	NA
Dioscorera cirrhosa Lour	194	0.9875	0.0051	0.0545	88123	2072550	yes	SDM
Dioscorera decipiens Hook.f.	97	0.9915	0.0017	0.2829	23655	2137018	yes	SDM
Dioscorera glabra Roxb.	384	0.9684	0.0095	0.1827	101498	2059175	yes	SDM
Dioscorera hamiltonii Hook.f.	265	0.9803	0.0068	0.1138	74152	2086521	yes	SDM
Dioscorera hispida Dennst.	343	0.9612	0.0106	0.1712	146527	2014146	yes	SDM
Dioscorera inopinata Prain & Burkill	6	0.999	-1	0.4734	716	2159957	yes	CA50
Dioscorera lanata Bail	8	0.966	-1	0.6848	916	2162091	yes	CA50
Dioscorera mangenotiana J. Miege	74	0.9934	0.0034	0.2366	9197	2151476	yes	SDM
Dioscorera minutiflora Engl	515	0.9764	0.0055	0.119	105368	2055305	yes	SDM
Dioscorera nummularia Lam	263	0.9787	0.0065	0.1832	59476	2101197	yes	SDM
Dioscorera oryzetorum Prain & Burkill	52	0.9933	0.0022	0.0164	24265	2138742	yes	SDM
Dioscorera pentaphylla L.	651	0.9546	0.0081	0.155	179987	1980686	yes	SDM
Dioscorera praehensilis Benth.	1229	0.9569	0.0052	0.1599	153735	2006938	yes	SDM
Dioscorera pynaertii De Wild.	7	0.9608	-1	0.3636	46197	2114476	yes	CA50
Dioscorera sagittifolia Pax	546	0.985	0.0051	0.1332	57113	2103560	yes	SDM
Dioscorera schimperiana Hochst. ex Kunth	344	0.9717	0.0087	0.1308	112504	2048169	yes	SDM
Dioscorera smilacifolia De Wild. & T. Durand	402	0.9834	0.0044	0.1814	56531	2104142	yes	SDM
Dioscorera togoensis R. Knuth	444	0.9877	0.0025	0.157	32532	2128141	yes	SDM
Dioscorera transversa R. Br.	2896	0.963	0.003	0.2212	40537	2120136	yes	SDM
Dioscorera wallichii Hook.f.	64	0.9793	0.0087	0.1039	110183	2050490	yes	SDM

## Sheet: Table S2
Table S2: Population of global priority CWR in genebanks, in proteced areas and for further ex situ collection
Taxon	Number of Records	Number of accessions in genebank	Number of taxa population in PA	Number of PA found	Percentage population in genebank	Percentage population in PA	Taxa for further ex situ collection
Dioscorea abyssinica Hochst. ex Kunth	200	10	10	4	5	5	Yes
Dioscorea antaly Jum. & H.Perrier	187	3	0	0	1.6		Yes
Dioscorea arachidna Prain & Burkill	67	11	4	2	16.41	5.97	Yes
Dioscorea baya De Wild	156	12	23	2	7.69	14.74	Yes
Dioscorea brevipetiolata Prain & Burkill	65	23	2	1	35.83	3.07	Yes
Dioscorea burkilliana J. Miege	144	31	5	3	21.52	3.47	Yes
Dioscorea calcicola Prain & Burkill	2		0	0			Yes
Dioscorea cirrhosa Lour	180	28	3	1	15.55	1.66	Yes
Dioscorea decipiens Hook.f.	97	11	3	2	11.34	3.09	Yes
Dioscorea glabra Roxb.	357	54	6	4	15.1	1.68	No
Dioscorea hamiltonii Hook.f.	256	32	2	1	12.07	0.75	Yes
Dioscorea hispida Dennst.	204	58	1	1	19.87	0.31	No
Dioscorea inopinata Prain & Burkill	4		0	0			Yes
Dioscorea lanata Bail	7		6	1		75	Yes
Dioscorea mangenotiana J. Miege	74	34	1	1	45.9	1.35	Yes
Dioscorea minutiflora Engl	445	70	30	5	15.7	6.74	No
Dioscorea nummularia Lam	192	9	0	0	4.68		Yes
Dioscorea oryzetorum Prain & Burkill	45	12	1	1	26.66	2.22	Yes
Dioscorea pentaphylla L.	414	60	15	3	14.49	3.62	No
Dioscorea praehensilis Benth.	1165	112	16	5	9.61	1.37	No
Dioscorea pynaertii De Wild.	7		0	0			Yes
Dioscorea sagittifolia Pax	546	7	0	0	1.28		Yes
Dioscorea schimperiana Hochst. ex Kunth	342	16	6	2	4.67	1.75	Yes
Dioscorea smilacifolia De Wild. & T. Durand	396	24	42	6	6.06	10.6	Yes
Dioscorea togoensis R. Knuth	443	6	4	2	1.35	0.9	Yes
Dioscorea transversa R. Br.	2759		247	37		8.95	Yes
Dioscorea wallichii Hook.f.	58	4	2	1	6.89	3.44	Yes
Total	8812	627	429	85

## Sheet: Table S3
Table S3: Number of occurrence data, in proteced area and genebank by country
Country	Number of occurrence records	Number of population in PA	Number of accession in genebank	Number of PA
Angola	24		1
Australia	2777	247		37
Bangladesh	13		1
Benin	1249		8
Burkina Faso	32		1
Burundi	25		3
Cambodia	41		23
Cameroon	392	36	16	2
Central African Republic (the)	67	34	1	1
Chad	2			1
China	322	13	22	1
Congo (the Democratic Republic of the)	193	56		2
Congo (the)	34	38	31	2
Cote d'Ivoire	511	12	210	1
Equatorial Guinea	18		2
Eritrea	1
Ethiopia	101	5	6	1
Fiji	13
Gabon	116	6	11	2
Ghana	226		7
Guinea	66	15	1	3
Guinea-Bissau	31		1
India	222	1	24	1
Indonesia	75	3	14	1
Japan	12
Kenya	26		1
Lao People's Democratic Republic (the)	27		17
Liberia	91		10
Madagascar	180		5
Malawi	51		1
Malaysia	113		8
Mali	12		4
Mozambique	30	1	2	1
Myanmar	42		1
Nepal	11
New Caledonia	4
Niger (the)	1
Nigeria	147		2
Papua New Guinea	78		5
Philippines	117		28
Rwanda	3
Senegal	49
Sierra Leone	57	1		1
Singapore	7
South Sudan	2
Sri Lanka	34		3
Sudan (the)	5
Taiwan (Province of China)	109		2
Tanzania	103
Thailand	564	17	62	3
Togo	131
Uganda	52
Vietnam	137	6	92	2
Yemen	7	6		1
Zambia	46
Zimbabwe	13
	8812	497	626

## Sheet: Table S4
Table S4: Percentage conribution of selected environmenal variables used in MaxEnt
Ecogeographic variables	Taxon	D abyssinica	D antaly	D arachidna	D baya	brevipetiolata	D burkilliana	D calcicola	D cirrhosa	D decipiens	D glabra	D hamiltonii	D hispida	inopinata	D lanata	D mangenotiana	D minutiflora	D nummularia L	D oryzetorum	D pentaphylla	D praehensilis	D pynaertii	D sagittifolia	D schimperiana	D smilacifolia	D togoensis	D transversa	D wallichii
Bioclimatic variable
bio_1		1.3		1.2	0.8	0.4				1.8	4.3	0.1	1.1	4.2		0.1	0.1	0.6	1.5	2.1	0.3		8.9		0.7	8.2	0.3	8.6
bio_2		1.6		0.1	0.4	1.5			18.6	2.3	1.1	4.2	2.4		19.4			2		3.4	1.2		1.4	0.6	0.4	0.2	0.1	0.7
bio_3		1.5	21.5	5.7	0.1	1.4	9		1.7	8.6	0.6	6.4	1.2	1.6		7.3	7.3	10	4.4	2.9	0.4
bio_4		1.2	2.9	1.6	34.8	0.2	25.6		4.7	1.9	1.2	0.4	1.2		2.3	4.6	4.6	34.8	0.5	2.8	37.4	4.2	21.3	32.2	14.6	0.8	14.7	1.1
bio_5		1.5				0.9	0.3					0.1	0.1					0.6		0.1	1.5
bio_6		0.8		0.2		3.7			0.2		0.1	1.2	4.3		4.4	10.5	10.5	0.9			2.6	46.7	2.7	0.2	30.4	24.9	14.6
bio_7					0.2	0.2			1.4		0.2	0.3	0.1		21.7			0.8	0.6	1.5	0.2	10.6		0.6	0.6	0.1
bio_8		0.4			0.4		0.1				0.7	0.2				0.2	0.2			1.1
bio_9		1.8	0.1								0.7		0.7	0.3		0.1	0.1	1.2		0.1	0.1
bio_10		0.1								0.2		0.8						0.5			0.2
bio_11		23.5		9.7	3.4	8.2	4.8		0.1		2.3	0.1	3.5	32.7		1.1	1.1	4.7	20.2		1.7
bio_12		0.4		6.4	23	2.9	11.2			2.7	1.1		1	3.2				14.9		0.4	0.7	2	17.6	15.3	15.7	5.5	7.1	40.4
bio_13			13.7	28.8	0.2	31.8	0.2		9.9	26.2	53.4	0.5	52.2	0.2	3.3	4.8	4.8	0.7	26.2	56.9
bio_14		7	1	4.4	1.1	7.3	5.6			0.3	1.7	0.1	2.9	0.5		1	1	2	5.2	0.4	3.6		9.1	0.6	2.2	8.1	0.3	13.2
bio_15		0.4	20.9	6.9	0.4	4.1	0.2		0.2	15.3	1.5	7.1	0.3		1.9	2.9	2.9		2.3		0.1
bio_16		11.5		3.7	0.3	0.4	0.3		19.7	0.2	0.1	4.2	0.1	1.7	21.6			0.6			17.9
bio_17		0.6		2.6		2.7	2.1		0.4	2.8	0.4	0.2	2.1			1.2	1.2	2.2	5.3	0.6	0.7		0.5	0.9	1.5	0.2	0.1	0.1
bio_18			22.5	0.6	5.9	4.6	3.2		24.8	4.4		12.4	3.2			4.9	4.9	1.7	2.9	0.4	0.3	0.4	1.1	0.2	1	0.1	41.2	0.6
bio_19		18.3		3.7	0.7	1.7	5.8		0.1	5.2	2.1	0.4	1.2			20	20	0.6	3.3	0.1	0.5		3.2	0.5	0.9	13.6	0.3	0.1
Edaphic variables
awc1		1.1																0.3			0.4			0.5		0.1	0.8
awc2		0.5							0.4			0.9								0.1	0.1	0.2	0.2	0.4	0.1		0.6
awc3		0.8			0.3		0.1		1.1				0.5					0.1				4	1.1	0.3		0.5	0.2	0.1
awct				0.1	5.3	1	0.8		0.4		0.5	0.1				7.1	7.1	0.2	0.4	0.2	0.1			1.6	0.2		0.3	0.1
r_horizon		5.2	9	5.9	5.4	2.1	6		0.3	2.4	0.7	0.4	0.5			8.8	8.8	5.5	1.1	0.9	3.2	8	2.8	4.8	8.3	11.6	2.6	0.7
t_bulk_den									0.1		0.4	0.1	0.1	0.3				0.1	1.3	1	0.2		0.1			0.2	0.1
t_cec_sol			0.4		0.2		3.3		0.2	0.1	1.4	0.7	0.6		0.5			0.1	0.1	4.1	1.8	0.7	5.9	0.1	0.1	0.7	0.7	7.7
t_clay_cont		0.3	0.5	0.2	0.1	0.2			5.3	0.2	0.2	0.2	1.9		1.9	2.3	2.3	0.2		2.3	0.2		0.8	0.7	0.2	0.6	0.4	3.9
t_coarse_frag		15.5	5	8.5	9.1	10.4	17		2.2	21.1	9.5	8.1	5.7	0.2	3.2	22.1	22.1	11.4	6.8	7.8	10.4	2.6	17.5	3.1	14.1	21.2	1.4	20.5
t_oc_cont		0.8		0.1	0.1		0.3				0.3	0.5	0.1	2.5	11.5			0.1		0.1	0.9
t_oc_den				0.4	0.2	0.1			0.3		0.1	0.1						0.3	0.2		0.1				0.1			0.2
t_oc_stock		0.4		0.4	0.2						0.1							0.1		0.1	0.2
t_ph_hox		1		0.8	0.7	0.4	0.6		1	0.2	0.1	1.5	1.8	3.2	4.3			0.1	2.1	0.6	7.4		0.8	1.8	1.6	0.8	0.7	0.2
t_ph_kcl		0.1	0.7	0.6	0.1	0.2	0.3		2		1.8		1.5	1.3				0.9	3.8	2.8	2	20.7	0.3	1.3	0.1	1.4	0.2
t_silt			0.5	5.6	5	4.3	2.7		1.1	2.5	7	4.9	7.7	7.4		0.8	0.8	2.2	4.4	5.5	1.2		1	1.7	5.7	0.3	13.4	0.4
Ecogeographic variables
aspect			0.6	0.3	0.9	1.1	0.2		0.2	0.8	0.2	0.2	0.3	27.5				0.4		0.4	0.2		0.1	0.4		0.1		0.1
elev		0.7		0.9	0.2	6	0.2		0.3	0.1	0.2	0.2	0.2	13.5				0.1	6	0.2	0.4		2.2	30.5	0.2	0.4	3.3	0.7
eastness		1.5	0.5	0.1	0.1	0.4			0.2		0.3	1.1	0.3		4			2.3	0.4		1.6		1.3	1.3	1.3	0.4	1.2	0.6
northness		0.4				1.2			1.1		0.1		0.3					0.7	0.9	0.7
slope		0.1	0.1	0.5	0.1	0.5			1.8	0.4	1	0.8
Total number of variables		30	16	28	30	29	24		29	22	33	32	31	16	13	18	18	35	23	29	34	11	22	23	22	23	23	20

## Sheet: Table S5
Table: Ecogeographic variables used for the SDM and ELC map analysis
No	Component	Variable	Description	Unit	Source
1	Bioclim	bio_1	Annual average temperature	° C	WorldClim
2	Bioclim	bio_2	Average daytime temperature range	° C	WorldClim
3	Bioclim	bio_3	Isothermality	° C	WorldClim
4	Bioclim	bio_4	Temperature seasonality	° C	WorldClim
5	Bioclim	bio_5	Maximum temperature for the warmest month	° C	WorldClim
6	Bioclim	bio_6	Maximum temperature for the coldest month	° C	WorldClim
7	Bioclim	bio_7	Annual temperature range	° C	WorldClim
8	Bioclim	bio_8	Average temperature for the quarter with the most precipitation	° C	WorldClim
9	Bioclim	bio_9	Average temperature for the driest quarter	° C	WorldClim
10	Bioclim	bio_10	Average temperature for the hotest quarter	° C	WorldClim
11	Bioclim	bio_11	Average temperature for the coldest quarter	° C	WorldClim
12	Bioclim	bio_12	Annual precipitation	mm	WorldClim
13	Bioclim	bio_13	Precipitation during the wettest month	mm	WorldClim
14	Bioclim	bio_14	Precipitation during the driest month	mm	WorldClim
15	Bioclim	bio_15	Seasonality of precipitation (variation coefficient)	mm	WorldClim
16	Bioclim	bio_16	Precipitation during the wettest quarter (3 rainest months)	mm	WorldClim
17	Bioclim	bio_17	Precipitation during the driest quarter (3 driest months)	mm	WorldClim
18	Bioclim	bio_18	Precipitation during the hottest quarter (3 hottest months)	mm	WorldClim
19	Bioclim	bio_19	Precipitation during the coldest quarter (3 coldest months)	mm	WorldClim
20	Bioclim	vapr_annual	Water vapour pressure annual	kPa	WorldClim
21	Edaphic	t_sand	Sand content in top soil	%weight	ISRIC
22	Edaphic	t_silt	Silt content in top soil	%weight	ISRIC
23	Edaphic	t_clay_cont	Clay content in top soil	%weight	ISRIC
24	Edaphic	t_ref_bulk	Bulk density reference in top soil	kg/dm3	ISRIC
25	Edaphic	t_oc_cont	Organic carbon content in top soil	%weight	ISRIC
26	Edaphic	t_cec	Cation exchange capacity in top soil	cmol/kg	ISRIC
27	Edaphic	t_phh2o	top soil pH in a soil water solution	-log(H+)	ISRIC
28	Edaphic	t_phhox	Soil Ph x 10 in H2O	-log(H+)	ISRIC
29	Edaphic	t_awc1	Available soil water capacity (volumetric fraction) for h1 top soil	ml	ISRIC
30	Edaphic	t_awc2	Available soil water capacity (volumetric fraction) for h2 top soil	ml	ISRIC
31	Edaphic	t_awc3	Available soil water capacity (volumetric fraction) for h3 top soil	ml	ISRIC
32	Edaphic	t_awct	Available soil water capacity (volumetric fraction) for tS top soil	ml	ISRIC
33	Edaphic	t_coarse_frag	Coarse fragments volumetrics	%weight	ISRIC
34	Edaphic	t_oc_den	Soil organic carbon density	kg/m3	ISRIC
35	Edaphic	r_horizon	Probability of occurrence of R horizon		ISRIC
36	Edaphic	t_oc_stock	Soil organic carbon stock	tons/ha	ISRIC
37	Geophysical	aspect	Aspect of the land	degree (° )	NASA
38	Geophysical	elev	Elevation. Height above sea level	m	WorldClim
39	Geophysical	slope	Slope of the land surface	degree (° )	NASA
40	Geophysical	srad_1	Solar radiation January	W/m2	WorldClim
41	Geophysical	srad_2	Solar radiation February	W/m2	WorldClim
42	Geophysical	srad_3	Solar radiation March	W/m2	WorldClim
43	Geophysical	srad_4	Solar radiation April	W/m2	WorldClim
44	Geophysical	srad_5	Solar radiation May	W/m2	WorldClim
45	Geophysical	srad_6	Solar radiation June	W/m2	WorldClim
46	Geophysical	srad_7	Solar radiation July	W/m2	WorldClim
47	Geophysical	srad_8	Solar radiation August	W/m2	WorldClim
48	Geophysical	srad_9	Solar radiation September	W/m2	WorldClim
49	Geophysical	srad_10	Solar radiation October	W/m2	WorldClim
50	Geophysical	srad_11	Solar radiation November	W/m2	WorldClim
51	Geophysical	srad_12	Solar radiation December	W/m2	WorldClim
52	Geophysical	srad_annual	Solar radiation annual	W/m2	WorldClim
53	Geophysical	wind_annual	Wind speed annual	m/s	WorldClim

## Sheet:  Table S6
Table S6: Seleced ecogeographic variables used for the ELC map analysis
Ecogeographic variables	Taxon	D abyssinica	D antaly	D arachidna	D baya	D burkilliana	D cirrhosa	D hispida	D minutiflora	D praehensilis	D sagittifolia	D schimperiana	D transversa	D wallichii
Bioclimatic variable
		bio_4	bio_1	bio_6	bio_4	bio_1	bio_1	bio_4	bio_4	bio_4	bio_6	bio_1	bio_1	bio_4
		bio_6	bio_6	bio_7	bio_14	bio_9	bio_11	bio_6	bio_9	bio_5	bio_9	bio_4	bio_9	bio_6
		bio_7	bio_9	bio_11	bio_17	bio_10	bio_17	bio_7	bio_10	bio_9	bio_16	bio_9	bio_11	bio_10
		vapr_annual	bio_11	vapr_annual	bio_19	bio_12	vapr_annual	vapr_annual	bio_19	bio_12	vapr_annual	bio_11	vapr_annual	bio_16
Edaphic variables
		t_awc1	t_awct	t_awc1	t_awct	t_awc1	t_awct	t_awc1	t_awc1	t_awc1	t_awc1	t_awc1	t_awct	t_awc1
		t_clay_cont	t_bulk_den	t_awc2	t_bulk_den	t_clay_cont	r_horizon	t_awct	t_awct	t_clay_cont	t_bulk_den	t_awct	t_oc_cont	t_awc2
		t_ph_hox	t_oc_cont	t_bulk_den	t_oc_den	t_oc_stock	t_bulk_den	r_horizon	t_bulk_den	t_oc_den	t_sand_cont	t_oc_stock	t_oc_den	t_awc3
		t_sand_cont	t_oc_den	t_oc_den	t_oc_stock	t_sand_cont	t_oc_stock	t_oc_den	t_oc_stock	t_oc_stock	t_silt	t_bulk_den	t_oc_stock	t_oc_den
Ecogeographic variables
		elev	elev	elev	elev	srad_annual	srad_annual	srad_annual	elev	elev	elev	srad_annual	srad_annual	elev
		srad_annual	srad_annual	slope	wind_annual	wind_annual	wind_annual	wind_annual	srad_annual	srad_annual	srad_annual	wind_annual	wind_annual	srad_annual
		wind_annual	wind_annual	wind_annual							wind_annual			wind_annual
Total number of variables		11	11	11	10	10	10	10	10	10	11	10	10	11

## Sheet:  Table S7
Table S7: Number of ELC categories, genebank and ELC map percenage frequencies of global yam priority CWR
S/N		ELC_CAT	GBfreq	GBpercentage	GB_quartile_classification	TotalCellsFreq	ELCmap_percentage	Quartile_classes_ELCmap
1	D. abyssinica	1	2	0.33557	baja/low	1589	1.89304	media alta/mid-high
		2	0	0	nula	2000	2.38268	media alta/mid-high
		3	183	30.7047	alta/high	2227	2.65312	media alta/mid-high
		4	0	0	nula	2398	2.85684	media alta/mid-high
		5	2	0.33557	baja/low	657	0.782711	media baja/mid-low
		6	0	0	nula	84	0.100073	baja/low
		7	32	5.36913	alta/high	18568	22.1208	alta/high
		8	0	0	nula	1117	1.33073	media baja/mid-low
		9	229	38.4228	alta/high	7107	8.46686	alta/high
		10	21	3.52349	media alta/mid-high	8563	10.2015	alta/high
		11	3	0.503356	media baja/mid-low	4946	5.89237	alta/high
		12	79	13.255	alta/high	15042	17.9202	alta/high
		13	0	0	nula	80	0.0953073	baja/low
		14	5	0.838926	media alta/mid-high	425	0.50632	media baja/mid-low
		15	0	0	nula	764	0.910185	media baja/mid-low
		16	1	0.167785	baja/low	1160	1.38196	media alta/mid-high
		17	0	0	nula	44	0.052419	baja/low
		18	0	0	nula	3962	4.72009	alta/high
		19	3	0.503356	media baja/mid-low	235	0.279965	baja/low
		20	0	0	nula	169	0.201337	baja/low
		21	2	0.33557	baja/low	71	0.0845852	baja/low
		22	4	0.671141	media baja/mid-low	2014	2.39936	media alta/mid-high
		23	19	3.18792	media alta/mid-high	5889	7.01581	alta/high
		24	0	0	nula	1057	1.25925	media baja/mid-low
		25	2	0.33557	baja/low	653	0.777946	media baja/mid-low
		26	0	0	nula	2	0.00238268	baja/low
		27	0	0	nula	1042	1.24138	media baja/mid-low
2	D. antaly	ELC_CAT	GBfreq	GBpercentage	GB_quartile_classification	TotalCellsFreq	ELCmap_percentage	Quartile_classes_ELCmap
		1	13	7.69231	media alta/mid-high	1391	17.9832	alta/high
		2	1	0.591716	baja/low	289	3.73626	media alta/mid-high
		3	2	1.18343	media baja/mid-low	174	2.24952	media alta/mid-high
		4	1	0.591716	baja/low	629	8.13187	alta/high
		5	0	0	nula	312	4.03361	media alta/mid-high
		6	2	1.18343	media baja/mid-low	284	3.67162	media alta/mid-high
		7	5	2.95858	media alta/mid-high	217	2.80543	media alta/mid-high
		8	0	0	nula	87	1.12476	media baja/mid-low
		9	0	0	nula	23	0.29735	media baja/mid-low
		10	0	0	nula	65	0.840336	media baja/mid-low
		11	0	0	nula	30	0.387847	media baja/mid-low
		12	0	0	nula	1	0.0129282	baja/low
		13	15	8.87574	alta/high	776	10.0323	alta/high
		14	4	2.36686	media baja/mid-low	641	8.28701	alta/high
		15	0	0	nula	106	1.37039	media baja/mid-low
		16	0	0	nula	1	0.0129282	baja/low
		17	0	0	nula	1	0.0129282	baja/low
		18	1	0.591716	baja/low	5	0.0646412	baja/low
		19	0	0	nula	15	0.193924	baja/low
		20	1	0.591716	baja/low	43	0.555915	media baja/mid-low
		21	0	0	nula	116	1.49968	media alta/mid-high
		22	0	0	nula	4	0.051713	baja/low
		23	0	0	nula	1	0.0129282	baja/low
		24	0	0	nula	18	0.232708	media baja/mid-low
		25	71	42.0118	alta/high	784	10.1357	alta/high
		26	10	5.91716	media alta/mid-high	315	4.0724	alta/high
		27	17	10.0592	alta/high	167	2.15902	media alta/mid-high
3	D. arachidna	ELC_CAT	GBfreq	GBpercentage	GB_quartile_classification	TotalCellsFreq	ELCmap_percentage	Quartile_classes_ELCmap
		1	0	0	nula	2	0.0100766	baja/low
		2	0	0	nula	5	0.0251915	baja/low
		3	0	0	nula	8	0.0403063	baja/low
		4	0	0	nula	103	0.518944	media baja/mid-low
		5	0	0	nula	54	0.272068	media baja/mid-low
		6	0	0	nula	542	2.73075	media alta/mid-high
		7	1	3.0303	baja/low	3278	16.5155	alta/high
		8	0	0	nula	580	2.92221	media alta/mid-high
		9	3	9.09091	media baja/mid-low	2608	13.1399	alta/high
		10	4	12.1212	media baja/mid-low	1166	5.87465	alta/high
		11	0	0	nula	338	1.70294	media baja/mid-low
		12	4	12.1212	media baja/mid-low	1059	5.33555	media alta/mid-high
		13	1	3.0303	baja/low	946	4.76622	media alta/mid-high
		14	0	0	nula	9	0.0453446	baja/low
		15	0	0	nula	478	2.4083	media baja/mid-low
		16	11	33.3333	alta/high	2533	12.762	alta/high
		17	0	0	nula	633	3.18924	media alta/mid-high
		18	5	15.1515	alta/high	3920	19.7501	alta/high
		19	0	0	nula	22	0.110842	baja/low
		20	0	0	nula	24	0.120919	baja/low
		21	0	0	nula	75	0.377872	media baja/mid-low
4	D. baya	ELC_CAT	GBfreq	GBpercentage	GB_quartile_classification	TotalCellsFreq	ELCmap_percentage	Quartile_classes_ELCmap
		1	0	0	nula	67	0.136534	baja/low
		2	3	3.22581	media baja/mid-low	490	0.998533	media baja/mid-low
		3	0	0	nula	275	0.560401	media baja/mid-low
		4	4	4.30108	media baja/mid-low	760	1.54874	media baja/mid-low
		5	0	0	nula	92	0.18748	baja/low
		6	4	4.30108	media baja/mid-low	2239	4.56268	media alta/mid-high
		7	0	0	nula	48	0.0978155	baja/low
		8	11	11.828	alta/high	9165	18.6766	alta/high
		9	5	5.37634	media alta/mid-high	4162	8.48142	alta/high
		10	1	1.07527	baja/low	191	0.389224	baja/low
		11	1	1.07527	baja/low	3052	6.21943	alta/high
		12	0	0	nula	820	1.67101	media baja/mid-low
		13	0	0	nula	246	0.501304	baja/low
		14	1	1.07527	baja/low	3686	7.51141	alta/high
		15	0	0	nula	915	1.86461	media alta/mid-high
		16	7	7.52688	alta/high	290	0.590968	media baja/mid-low
		17	4	4.30108	media baja/mid-low	4083	8.32043	alta/high
		18	7	7.52688	alta/high	3145	6.40895	alta/high
		19	1	1.07527	baja/low	537	1.09431	media baja/mid-low
		20	38	40.8602	alta/high	7047	14.3605	alta/high
		21	4	4.30108	media baja/mid-low	1920	3.91262	media alta/mid-high
		22	0	0	nula	189	0.385148	baja/low
		23	0	0	nula	274	0.558363	media baja/mid-low
		24	0	0	nula	969	1.97465	media alta/mid-high
		25	0	0	nula	42	0.0855885	baja/low
		26	0	0	nula	1361	2.77348	media alta/mid-high
		27	0	0	nula	1289	2.62675	media alta/mid-high
5	D. burkilliana	ELC_CAT	GBfreq	GBpercentage	GB_quartile_classification	TotalCellsFreq	ELCmap_percentage	Quartile_classes_ELCmap
		1	0	0	nula	1	0.00271628	baja/low
		2	0	0	nula	114	0.309656	media baja/mid-low
		3	0	0	nula	19	0.0516094	media baja/mid-low
		4	0	0	nula	127	0.344968	media baja/mid-low
		5	3	2.23881	media baja/mid-low	1880	5.10661	alta/high
		6	0	0	nula	441	1.19788	media alta/mid-high
		7	0	0	nula	1	0.00271628	baja/low
		8	0	0	nula	42	0.114084	media baja/mid-low
		9	0	0	nula	5	0.0135814	baja/low
		10	0	0	nula	2	0.00543257	baja/low
		11	0	0	nula	5	0.0135814	baja/low
		12	0	0	nula	7	0.019014	baja/low
		13	0	0	nula	17	0.0461768	media baja/mid-low
		14	75	55.9701	alta/high	9513	25.84	alta/high
		15	3	2.23881	media baja/mid-low	654	1.77645	media alta/mid-high
		16	0	0	nula	89	0.241749	media baja/mid-low
		17	4	2.98507	media alta/mid-high	5627	15.2845	alta/high
		18	24	17.9104	alta/high	8061	21.896	alta/high
		19	0	0	nula	1495	4.06084	media alta/mid-high
		20	0	0	nula	549	1.49124	media alta/mid-high
		21	2	1.49254	baja/low	1680	4.56336	media alta/mid-high
		22	2	1.49254	baja/low	206	0.559555	media alta/mid-high
		23	13	9.70149	media alta/mid-high	2779	7.54855	alta/high
		24	5	3.73134	media alta/mid-high	2013	5.46788	alta/high
		25	0	0	nula	124	0.336819	media baja/mid-low
6	D. cirrhosa	ELC_CAT	GBfreq	GBpercentage	GB_quartile_classification	TotalCellsFreq	ELCmap_percentage	Quartile_classes_ELCmap
		1	0	0	nula	2	0.00520143	baja/low
		2	0	0	nula	1108	2.88159	media alta/mid-high
		3	0	0	nula	558	1.4512	media baja/mid-low
		4	2	1.65289	baja/low	304	0.790617	media baja/mid-low
		5	1	0.826446	baja/low	1669	4.34059	media alta/mid-high
		6	0	0	nula	2	0.00520143	baja/low
		7	9	7.43802	media alta/mid-high	9748	25.3517	alta/high
		8	10	8.26446	alta/high	3633	9.44839	alta/high
		9	2	1.65289	baja/low	1030	2.67873	media alta/mid-high
		10	0	0	nula	239	0.62157	media baja/mid-low
		11	0	0	nula	461	1.19893	media baja/mid-low
		12	14	11.5702	alta/high	34	0.0884242	baja/low
		13	2	1.65289	baja/low	103	0.267873	baja/low
		14	8	6.61157	media alta/mid-high	7859	20.439	alta/high
		15	6	4.95868	media alta/mid-high	4105	10.6759	alta/high
		16	0	0	nula	2	0.00520143	baja/low
		17	3	2.47934	media baja/mid-low	786	2.04416	media alta/mid-high
		18	4	3.30579	media baja/mid-low	758	1.97134	media baja/mid-low
7	D. hispida	ELC_CAT	GBfreq	GBpercentage	GB_quartile_classification	TotalCellsFreq	ELCmap_percentage	Quartile_classes_ELCmap
		1	3	2.12766	media baja/mid-low	10953	14.3691	alta/high
		2	9	6.38298	media alta/mid-high	6056	7.9448	media alta/mid-high
		3	15	10.6383	alta/high	9004	11.8122	alta/high
		4	0	0	nula	3133	4.11015	media alta/mid-high
		5	1	0.70922	baja/low	1730	2.26957	media baja/mid-low
		6	0	0	nula	2	0.00262378	baja/low
		7	5	3.5461	media alta/mid-high	1533	2.01112	media baja/mid-low
		8	10	7.0922	media alta/mid-high	1047	1.37355	media baja/mid-low
		9	0	0	nula	309	0.405373	baja/low
		10	1	0.70922	baja/low	1722	2.25907	media baja/mid-low
		11	2	1.41844	media baja/mid-low	2891	3.79267	media alta/mid-high
		12	1	0.70922	baja/low	342	0.448666	media baja/mid-low
		13	2	1.41844	media baja/mid-low	105	0.137748	baja/low
		14	0	0	nula	93	0.122006	baja/low
		15	46	32.6241	alta/high	8030	10.5345	alta/high
		16	18	12.766	alta/high	6972	9.14649	alta/high
		17	1	0.70922	baja/low	1040	1.36436	media baja/mid-low
		18	0	0	nula	53	0.0695301	baja/low
		19	0	0	nula	2864	3.75725	media alta/mid-high
		20	0	0	nula	45	0.059035	baja/low
		21	0	0	nula	2661	3.49093	media alta/mid-high
		22	2	1.41844	media baja/mid-low	8002	10.4977	alta/high
8	D. munitiflora	ELC_CAT	GBfreq	GBpercentage	GB_quartile_classification	TotalCellsFreq	ELCmap_percentage	Quartile_classes_ELCmap
		1	0	0	nula	18	0.0280627	baja/low
		2	0	0	nula	309	0.481744	media baja/mid-low
		3	0	0	nula	325	0.506688	media baja/mid-low
		4	2	0.735294	baja/low	238	0.371052	baja/low
		5	0	0	nula	118	0.183967	baja/low
		6	0	0	nula	436	0.679742	media baja/mid-low
		7	0	0	nula	393	0.612703	media baja/mid-low
		8	21	7.72059	media alta/mid-high	13635	21.2575	alta/high
		9	10	3.67647	media alta/mid-high	3102	4.83614	alta/high
		10	8	2.94118	media baja/mid-low	272	0.424059	baja/low
		11	0	0	nula	538	0.838764	media baja/mid-low
		12	7	2.57353	media baja/mid-low	1103	1.71962	media alta/mid-high
		13	2	0.735294	baja/low	2483	3.8711	media alta/mid-high
		14	1	0.367647	baja/low	985	1.53566	media alta/mid-high
		15	4	1.47059	media baja/mid-low	2189	3.41274	media alta/mid-high
		16	0	0	nula	54	0.0841882	baja/low
		17	0	0	nula	72	0.112251	baja/low
		18	10	3.67647	media alta/mid-high	1526	2.3791	media alta/mid-high
		19	11	4.04412	media alta/mid-high	8271	12.8948	alta/high
		20	59	21.6912	alta/high	15881	24.7591	alta/high
		21	1	0.367647	baja/low	454	0.707805	media baja/mid-low
		22	0	0	nula	332	0.517602	media baja/mid-low
		23	3	1.10294	media baja/mid-low	2241	3.49381	media alta/mid-high
		24	0	0	nula	251	0.391319	baja/low
		25	82	30.1471	alta/high	2568	4.00362	alta/high
		26	26	9.55882	alta/high	3699	5.76689	alta/high
9	D. praehensilis	ELC_CAT	GBfreq	GBpercentage	GB_quartile_classification	TotalCellsFreq	ELCmap_percentage	Quartile_classes_ELCmap
		1	26	2.82302	media alta/mid-high	4976	4.35471	alta/high
		2	57	6.18893	alta/high	1634	1.42998	media baja/mid-low
		3	1	0.108578	baja/low	342	0.299299	baja/low
		4	243	26.3844	alta/high	13355	11.6875	alta/high
		5	185	20.0869	alta/high	4922	4.30746	media alta/mid-high
		6	9	0.977199	media baja/mid-low	3449	3.01837	media alta/mid-high
		7	16	1.73724	media alta/mid-high	6889	6.02886	alta/high
		8	4	0.434311	media baja/mid-low	3241	2.83634	media alta/mid-high
		9	17	1.84582	media alta/mid-high	3208	2.80746	media alta/mid-high
		10	13	1.41151	media alta/mid-high	6425	5.6228	alta/high
		11	72	7.81759	alta/high	20339	17.7995	alta/high
		12	0	0	nula	175	0.15315	baja/low
		13	9	0.977199	media baja/mid-low	408	0.357058	media baja/mid-low
		14	150	16.2866	alta/high	2652	2.32088	media baja/mid-low
		15	6	0.651466	media baja/mid-low	20	0.0175029	baja/low
		16	3	0.325733	baja/low	1831	1.60239	media baja/mid-low
		17	6	0.651466	media baja/mid-low	3385	2.96236	media alta/mid-high
		18	0	0	nula	66	0.0577595	baja/low
		19	1	0.108578	baja/low	46	0.0402566	baja/low
		20	2	0.217155	baja/low	71	0.0621352	baja/low
		21	3	0.325733	baja/low	1493	1.30659	media baja/mid-low
		22	3	0.325733	baja/low	635	0.555716	media baja/mid-low
		23	0	0	nula	44	0.0385063	baja/low
		24	14	1.52009	media alta/mid-high	7646	6.69135	alta/high
		25	34	3.69164	media alta/mid-high	22436	19.6347	alta/high
		26	2	0.217155	baja/low	1472	1.28821	media baja/mid-low
10	D. sagittifolia	ELC_CAT	GBfreq	GBpercentage	GB_quartile_classification	TotalCellsFreq	ELCmap_percentage	Quartile_classes_ELCmap
		1	0	0	nula	1407	2.58108	media alta/mid-high
		2	0	0	nula	786	1.44188	media baja/mid-low
		3	0	0	nula	4	0.00733783	baja/low
		4	0	0	nula	365	0.669577	media baja/mid-low
		5	6	1.45985	media baja/mid-low	4406	8.08262	alta/high
		6	0	0	nula	5	0.00917229	baja/low
		7	1	0.243309	baja/low	533	0.977766	media baja/mid-low
		8	0	0	nula	1534	2.81406	media alta/mid-high
		9	0	0	nula	2551	4.6797	alta/high
		10	0	0	nula	1404	2.57558	media alta/mid-high
		11	0	0	nula	350	0.64206	media baja/mid-low
		12	0	0	nula	73	0.133915	baja/low
		13	10	2.43309	media alta/mid-high	284	0.520986	baja/low
		14	3	0.729927	media baja/mid-low	541	0.992442	media baja/mid-low
		15	0	0	nula	8	0.0146757	baja/low
		16	22	5.3528	alta/high	14433	26.4767	alta/high
		17	2	0.486618	baja/low	2469	4.52928	alta/high
		18	304	73.9659	alta/high	5111	9.37592	alta/high
		19	3	0.729927	media baja/mid-low	1461	2.68014	media alta/mid-high
		20	1	0.243309	baja/low	863	1.58314	media baja/mid-low
		21	0	0	nula	18	0.0330203	baja/low
		22	10	2.43309	media alta/mid-high	2125	3.89822	media alta/mid-high
		23	8	1.94647	media alta/mid-high	2115	3.87988	media alta/mid-high
		24	33	8.0292	alta/high	10520	19.2985	alta/high
11	D. schimperiana	ELC_CAT	GBfreq	GBpercentage	GB_quartile_classification	TotalCellsFreq	ELCmap_percentage	Quartile_classes_ELCmap
		1	5	2.33645	media baja/mid-low	16751	14.7521	alta/high
		2	13	6.07477	media alta/mid-high	18794	16.5513	alta/high
		3	6	2.80374	media baja/mid-low	2673	2.35403	media alta/mid-high
		4	18	8.41121	media alta/mid-high	14063	12.3849	alta/high
		5	17	7.94393	media alta/mid-high	16173	14.2431	alta/high
		6	3	1.40187	baja/low	2618	2.30559	media alta/mid-high
		7	0	0	nula	773	0.680757	media baja/mid-low
		8	1	0.46729	baja/low	1670	1.47072	media alta/mid-high
		9	0	0	nula	38	0.0334654	baja/low
		10	0	0	nula	1	0.000880669	baja/low
		11	0	0	nula	6	0.00528402	baja/low
		12	0	0	nula	27	0.0237781	baja/low
		13	0	0	nula	38	0.0334654	baja/low
		14	0	0	nula	98	0.0863056	media baja/mid-low
		15	0	0	nula	188	0.165566	media baja/mid-low
		16	0	0	nula	188	0.165566	media baja/mid-low
		17	5	2.33645	media baja/mid-low	437	0.384852	media baja/mid-low
		18	53	24.7664	alta/high	22416	19.7411	alta/high
		19	31	14.486	alta/high	7689	6.77147	media alta/mid-high
		20	58	27.1028	alta/high	5744	5.05856	media alta/mid-high
12	D. transversa	ELC_CAT	GBfreq	GBpercentage	GB_quartile_classification	TotalCellsFreq	ELCmap_percentage	Quartile_classes_ELCmap
		1	2	0.0896459	baja/low	7	0.0213012	baja/low
		2	7	0.313761	media baja/mid-low	2279	6.93506	alta/high
		3	0	0	nula	7	0.0213012	baja/low
		4	33	1.47916	media alta/mid-high	101	0.307346	media baja/mid-low
		5	33	1.47916	media alta/mid-high	91	0.276916	media baja/mid-low
		6	0	0	nula	197	0.599477	media baja/mid-low
		7	24	1.07575	media baja/mid-low	560	1.7041	media alta/mid-high
		8	53	2.37562	media alta/mid-high	3788	11.527	alta/high
		9	0	0	nula	44	0.133893	media baja/mid-low
		10	149	6.67862	alta/high	751	2.28531	media alta/mid-high
		11	920	41.2371	alta/high	6913	21.0365	alta/high
		12	0	0	nula	37	0.112592	media baja/mid-low
		13	0	0	nula	65	0.197797	media baja/mid-low
		14	35	1.5688	media alta/mid-high	3420	10.4072	alta/high
		15	1	0.0448229	baja/low	33	0.10042	baja/low
		16	80	3.58584	alta/high	769	2.34009	media alta/mid-high
		17	119	5.33393	alta/high	4352	13.2433	alta/high
		18	3	0.134469	baja/low	1	0.00304303	baja/low
		19	4	0.179292	baja/low	14	0.0426024	baja/low
		20	2	0.0896459	baja/low	2	0.00608606	baja/low
		21	5	0.224115	media baja/mid-low	586	1.78321	media alta/mid-high
		22	23	1.03093	media baja/mid-low	985	2.99738	media alta/mid-high
		23	20	0.896459	media baja/mid-low	1904	5.79393	media alta/mid-high
13	D. wallichi	ELC_CAT	GBfreq	GBpercentage	GB_quartile_classification	TotalCellsFreq	ELCmap_percentage	Quartile_classes_ELCmap
		1	0	0	nula	3	0.00718838	baja/low
		2	0	0	nula	42	0.100637	baja/low
		3	0	0	nula	119	0.285139	media baja/mid-low
		4	0	0	nula	958	2.29549	media alta/mid-high
		5	1	1.85185	baja/low	322	0.771553	media baja/mid-low
		6	2	3.7037	media baja/mid-low	5370	12.8672	alta/high
		7	0	0	nula	63	0.150956	media baja/mid-low
		8	5	9.25926	media alta/mid-high	6814	16.3272	alta/high
		9	0	0	nula	3202	7.6724	alta/high
		10	16	29.6296	alta/high	3854	9.23468	alta/high
		11	0	0	nula	1	0.00239613	baja/low
		12	0	0	nula	1266	3.0335	media alta/mid-high
		13	1	1.85185	baja/low	1985	4.75631	media alta/mid-high
		14	1	1.85185	baja/low	695	1.66531	media alta/mid-high
		15	0	0	nula	153	0.366608	media baja/mid-low
		16	0	0	nula	47	0.112618	baja/low
		17	1	1.85185	baja/low	291	0.697273	media baja/mid-low
		18	2	3.7037	media baja/mid-low	293	0.702065	media baja/mid-low
		19	0	0	nula	26	0.0622993	baja/low
		20	3	5.55556	media alta/mid-high	2927	7.01347	media alta/mid-high
		21	0	0	nula	4	0.00958451	baja/low
		22	2	3.7037	media baja/mid-low	2660	6.3737	media alta/mid-high
		23	3	5.55556	media alta/mid-high	1035	2.47999	media alta/mid-high
		24	0	0	nula	221	0.529544	media baja/mid-low
		25	5	9.25926	media alta/mid-high	4182	10.0206	alta/high

## Sheet: Table S8
Table S: Genebank frequency of global yam priority CWR
ELC category	Taxon	D abyssinica	D antaly	D arachidna	D baya	D burkilliana	D cirrhosa	D hispida	D minutiflora	D praehensilis	D sagittifolia	D schimperiana	D transversa	D wallichii	Total frequency
1		2	13	0	0	0	0	3	0	26	0	5	2	0	51
2		0	1	0	3	0	0	9	0	57	0	13	7	0	90
3		183	2	0	0	0	0	15	0	1	0	6	0	0	207
4		0	1	0	4	0	2	0	2	243	0	18	33	0	303
5		2	0	0	0	3	1	1	0	185	6	17	33	1	249
6		0	2	0	4	0	0	0	0	9	0	3	0	2	20
7		32	5	1	0	0	9	5	0	16	1	0	24	0	93
8		0	0	0	11	0	10	10	21	4	0	1	53	5	115
9		229	0	3	5	0	2	0	10	17	0	0	0	0	266
10		21	0	4	1	0	0	1	8	13	0	0	149	16	213
11		3	0	0	1	0	0	2	0	72	0	0	920	0	998
12		79	0	4	0	0	14	1	7	0	0	0	0	0	105
13		0	15	1	0	0	2	2	2	9	10	0	0	1	42
14		5	4	0	1	75	8	0	1	150	3	0	35	1	283
15		0	0	0	0	3	6	46	4	6	0	0	1	0	66
16		1	0	11	7	0	0	18	0	3	22	0	80	0	142
17		0	0	0	4	4	3	1	0	6	2	5	119	1	145
18		0	1	5	7	24	4	0	10	0	304	53	3	2	413
19		3	0	0	1	0		0	11	1	3	31	4	0	54
20		0	1	0	38	0		0	59	2	1	58	2	3	164
21		2	0	0	4	2		0	1	3	0		5	0	17
22		4	0		0	2		2	0	3	10		23	2	46
23		19	0		0	13			3	0	8		20	3	66
24		0	0		0	5			0	14	33			0	52
25		2	71		0	0			82	34				5	194
26		0	10		0				26	2					38
27		0	17		0										17
Total		587	143	29	91	131	61	116	247	876	403	210	1513	42

## Sheet: Table S9
Table S: Percentage Genebank frequency of the global yam priority CWR
ELC category	Taxon	D abyssinica	D antaly	D arachidna	D baya	D burkilliana	D cirrhosa	D hispida	D minutiflora	D praehensilis	D sagittifolia	D smilacifolia	D transversa	D wallichii	Total
1		0.33557	7.69231	0	0	0	0	2.12766	0	2.82302	0	2.33645	0.0896459	0	15.4047
2		0	0.591716	0	3.22581	0	0	6.38298	0	6.18893	0	6.07477	0.313761	0	22.778
3		30.7047	1.18343	0	0	0	0	10.6383	0	0.108578	0	2.80374	0	0	45.4387
4		0	0.591716	0	4.30108	0	1.65289	0	0.735294	26.3844	0	8.41121	1.47916	0	43.5557
5		0.33557	0	0	0	2.23881	0.826446	0.70922	0	20.0869	1.45985	7.94393	1.47916	1.85185	36.9317
6		0	1.18343	0	4.30108	0	0	0	0	0.977199	0	1.40187	0	3.7037	11.5673
7		5.36913	2.95858	3.0303	0	0	7.43802	3.5461	0	1.73724	0.243309	0	1.07575	0	25.3984
8		0	0	0	11.828	0	8.26446	7.0922	7.72059	0.434311	0	0.46729	2.37562	9.25926	47.4417
9		38.4228	0	9.09091	5.37634	0	1.65289	0	3.67647	1.84582	0	0	0	0	60.0653
10		3.52349	0	12.1212	1.07527	0	0	0.70922	2.94118	1.41151	0	0	6.67862	29.6296	58.0901
11		0.503356	0	0	1.07527	0	0	1.41844	0	7.81759	0	0	41.2371	0	52.0518
12		13.255	0	12.1212	0	0	11.5702	0.70922	2.57353	0	0	0	0	0	40.2292
13		0	8.87574	3.0303	0	0	1.65289	1.41844	0.735294	0.977199	2.43309	0	0	1.85185	20.9748
14		0.838926	2.36686	0	1.07527	55.9701	6.61157	0	0.367647	16.2866	0.729927	0	1.5688	1.85185	87.6677
15		0	0	0	0	2.23881	4.95868	32.6241	1.47059	0.651466	0	0	0.0448229	0	41.9885
16		0.167785	0	33.3333	7.52688	0	0	12.766	0	0.325733	5.3528	0	3.58584	0	63.0583
17		0	0	0	4.30108	2.98507	2.47934	0.70922	0	0.651466	0.486618	2.33645	5.33393	1.85185	21.135
18		0	0.591716	15.1515	7.52688	17.9104	3.30579	0	3.67647	0	73.9659	24.7664	0.134469	3.7037	150.733
19		0.503356	0	0	1.07527	0		0	4.04412	0.108578	0.729927	14.486	0.179292	0	21.1265
20		0	0.591716	0	40.8602	0		0	21.6912	0.217155	0.243309	27.1028	0.0896459	5.55556	96.3516
21		0.33557	0	0	4.30108	1.49254		0	0.367647	0.325733	0		0.224115	0	7.04668
22		0.671141	0		0	1.49254		1.41844	0	0.325733	2.43309		1.03093	3.7037	11.0756
23		3.18792	0		0	9.70149			1.10294	0	1.94647		0.896459	5.55556	22.3908
24		0	0		0	3.73134			0	1.52009	8.0292			0	13.2806
25		0.33557	42.0118		0	0			30.1471	3.69164				9.25926	85.4454
26		0	5.91716		0				9.55882	0.217155					15.6931
27		0	10.0592		0										1116.92

[truncated: 16 more sheets: Table S10,  Table S11, Table S12, Fig. S1, Fig. S2, Fig. S3, Fig. S4, Fig. S5, Fig. S6, Fig. S7, Fig. S8, Fig. S9, Fig. S10, Fig. S11, Fig. S12, Fig. S13]
